# Supplementary material
Source: publisher site journal article supplement (https://compcytogen.pensoft.net/article/12784/download/suppl/32/)
Supplement: Supplementary file

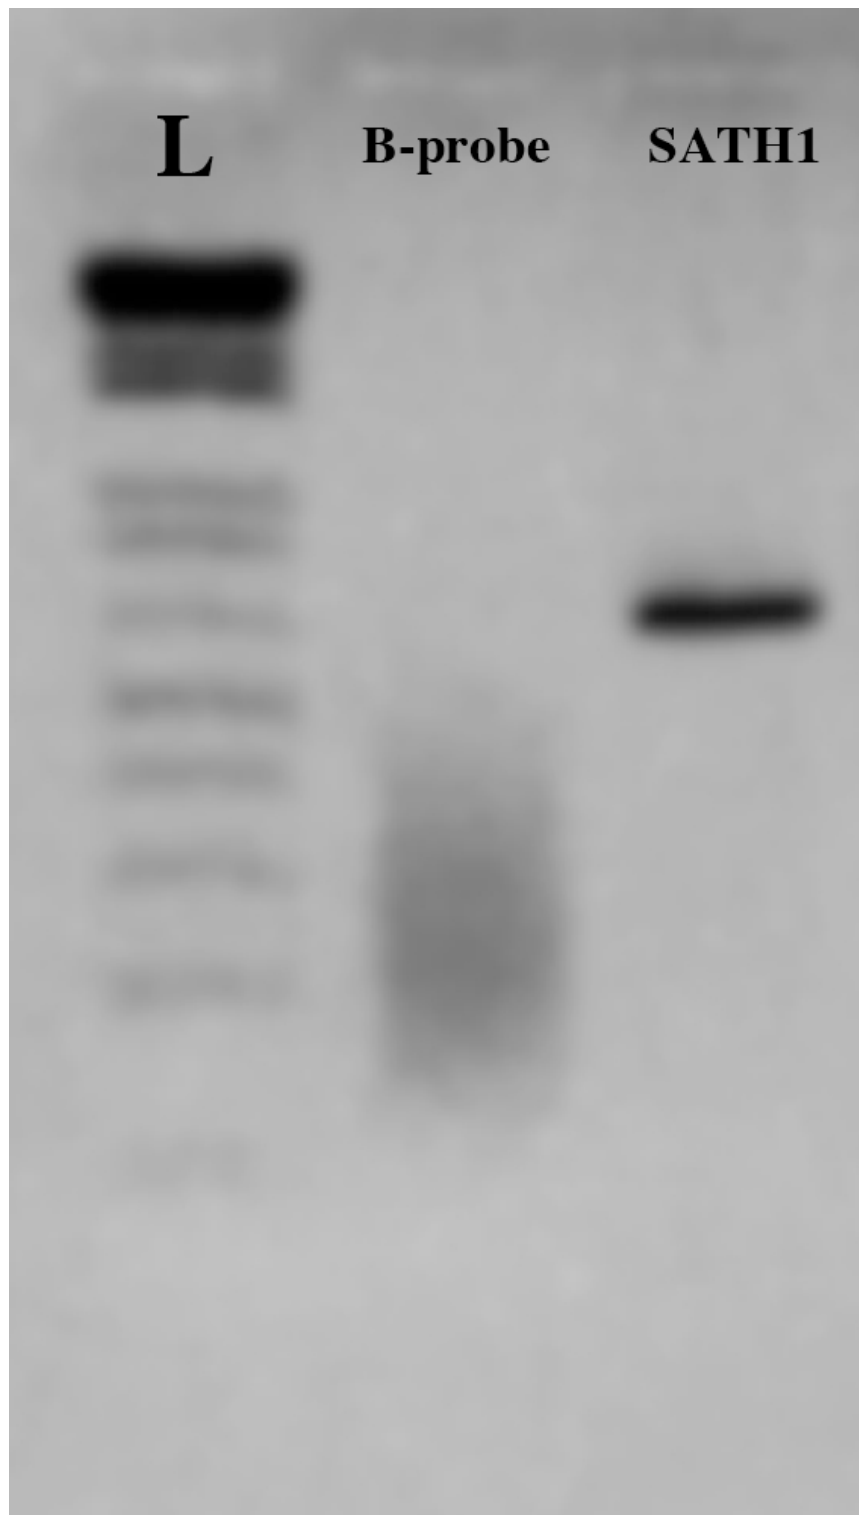

**Figure S2.** Amplification patterns of the B chromosome after WGA (B-probe lane) and the SATH1 satDNA (SATH1 lane) from *P. costatus* genome. L: 1 Kb Plus DNA Ladder.
